# Supplementary material
Source: publisher figshare collection journal article supplement (https://sage.figshare.com/ndownloader/files/17362799)
Supplement: Supplementary file 1 [file 17362799]

Appendix Figure A1. Correlation Matrix (N = 144)

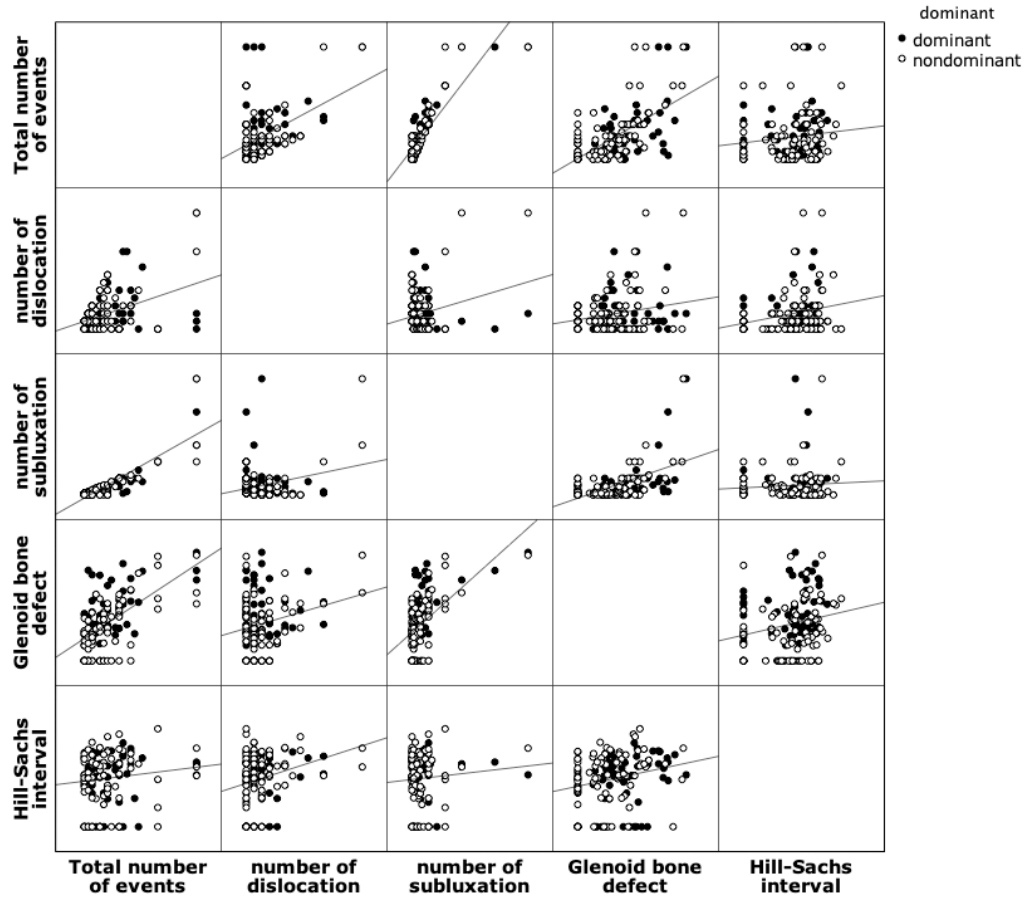

Values above and below represent Pearson's correlation coefficient and probability, respectively, in each box. HSL: Hill-Sachs lesion, \*: significant ( $p < 0.05$ ).

**Appendix Table A1.** Logistic regression analysis for the risk of a critical and subcritical bipolar bone defect

| Independent variables (n)           | Critical bipolar bone defect |                        | Subcritical bipolar bone defect |                       |
|-------------------------------------|------------------------------|------------------------|---------------------------------|-----------------------|
|                                     | Crude                        | Adjusted               | Crude                           | Adjusted              |
|                                     | Total number of injuries     | 1.2 (1.1-1.3), <0.01*  | 1.2 (1.1-1.3), <0.01*           | 1.2 (1.1-1.3), <0.01* |
| Age at CT examination               | 1.1 (1.0-1.3), 0.07          | 1.3 (0.9-1.9), 0.12    | 1.0 (0.9-1.1), 0.86             | 0.9 (0.7-1.3), 0.67   |
| Body mass index                     | 0.9 (0.8-1.1), 0.30          | 0.9 (0.7-1.1), 0.38    | 0.9 (0.8-1.0), 0.07             | 0.9 (0.7-1.0), 0.07   |
| Dislocation ( $\geq 1$ ) (100)      | 0.6 (0.3-1.4), 0.21          | 0.5 (0.2-1.6), 0.22    | 0.8 (0.4-1.6), 0.50             | 0.8 (0.3-2.0), 0.68   |
| Category Professional (11)          | 1.7 (0.4-7.2), 0.47          | 0.3 (0.01-10.8), 0.51  | 1.5 (0.4-6.1), 0.56             | 3.9 (0.2-87.6), 0.39  |
| College (50)                        | 1.4 (0.6-3.4), 0.41          | 0.6 (0.1-2.5), 0.47    | 0.7 (0.4-1.5), 0.37             | 0.8 (0.3-2.4), 0.68   |
| High school (83)                    | 1                            | 1                      | 1                               | 1                     |
| Competitive level Division1 (99)    | 0.7 (0.3-1.7), 0.47          | 0.9 (0.3-2.8), 0.80    | 0.6 (0.3-1.4), 0.24             | 0.9 (0.3-2.3), 0.79   |
| Division2(45)                       | 1                            | 1                      | 1                               | 1                     |
| Affected shoulder as dominance (69) | 2.2 (1.0-5.1), 0.06          | 4.9 (1.5-15.8), <0.01* | 2.1 (1.1-4.3), 0.03*            | 2.5 (1.1-5.5), 0.03*  |
| Forwards players (74)               | 0.5 (0.2-1.2), 0.15          | 0.5 (0.1-1.6), 0.21    | 1.0 (0.5-1.9), 0.93             | 0.8 (0.3-2.1), 0.72   |
| Hyperlaxity (62)                    | 0.4 (0.2-1.0), 0.05          | 0.6 (0.2-1.7), 0.30    | 0.5 (0.2-0.9), 0.03*            | 0.4 (0.2-0.9), 0.03*  |
| Indirect mechanism (132)            | 0.6 (0.2-1.6), 0.29          | 0.6 (0.6-2.1), 0.42    | 0.6 (0.4-1.2), 0.14             | 0.8 (0.4-1.7), 0.59   |

Numbers in the fields represent the odds ratio, 95% confidence interval in parentheses, and probability The  $p$ -value was calculated from logistic regression analysis, respectively. \*significant ( $p < 0.05$ ).

**Appendix Table A2.**

Statistics of the number of instability events calculated by univariate and multiple logistic regression analysis.

| Independent variable(s)                                      | Critical bipolar bone defect                  |                              | Subcritical bipolar bone defect |                             |
|--------------------------------------------------------------|-----------------------------------------------|------------------------------|---------------------------------|-----------------------------|
|                                                              | Dominant                                      | Non-dominant                 | Dominant                        | Non-dominant                |
|                                                              | the number of instability events (univariate) | 1.2 (1.1-1.4), 0.002*, 68.8  | 1.2 (1.1-1.3), <0.001*, 49.6    | 1.2 (1.0-1.4), 0.02*, 78.2  |
| the number of instability events, age at CT examination, BMI | 1.2 (1.1-1.4), 0.003*, 70.4                   | 1.2 (1.1-1.3), <0.001*, 51.8 | 1.2 (1.0-1.4), 0.02*, 80.2      | 1.2 (1.1-1.4), 0.003*, 94.5 |

CT: computed tomography, BMI: body mass index. Numbers in the fields represent odds ratio, 95% confidential interval in parentheses, probability, and Akaike’s Information Criterion of the number of instability events, respectively. \*: significant ( $p<0.05$ ).
